# Supplementary material for: Efficient production of adipic acid from 2-methoxycyclohexanone by aerobic oxidation with a phosphotungstic acid catalyst
Source: Royal Society of Chemistry journal article supplement (doi:10.1039/d0gc01277g), 2020-01-01
Supplement: d0gc01277g1.pdf [file d0gc01277g1.pdf]

Electronic supplementary information for:

Efficient production of adipic acid from 2-methoxycyclohexanone by  
aerobic oxidation with phosphotungstic acid catalyst

Kosuke Hatakeyama,<sup>a</sup> Yoshinao Nakagawa,<sup>a,b,\*</sup> Masazumi Tamura,<sup>a,b,†</sup> and Keiichi Tomishige<sup>a,b,\*</sup>

<sup>a</sup> Department of Applied Chemistry, School of Engineering, Tohoku University, Aoba 6-6-07,  
Aramaki, Aoba-ku, Sendai, 980–8579, Japan

<sup>b</sup> Research Center for Rare Metal and Green Innovation, Tohoku University, Aoba 468-1, Aramaki,  
Aoba-ku, Sendai, 980–0845, Japan

\* Corresponding authors.

Yoshinao Nakagawa: yoshinao@erec.che.tohoku.ac.jp; tel&fax: +81-22-795-7215.

Keiichi Tomishige: tomi@erec.che.tohoku.ac.jp; tel&fax: +81-22-795-7214.

† Current address: Research Center for Artificial Photosynthesis, The Advanced Research Institute  
for Natural Science and Technology, Osaka City University, 3-3-138 Sugimoto, Sumiyoshi, Osaka,  
558-8585, Japan

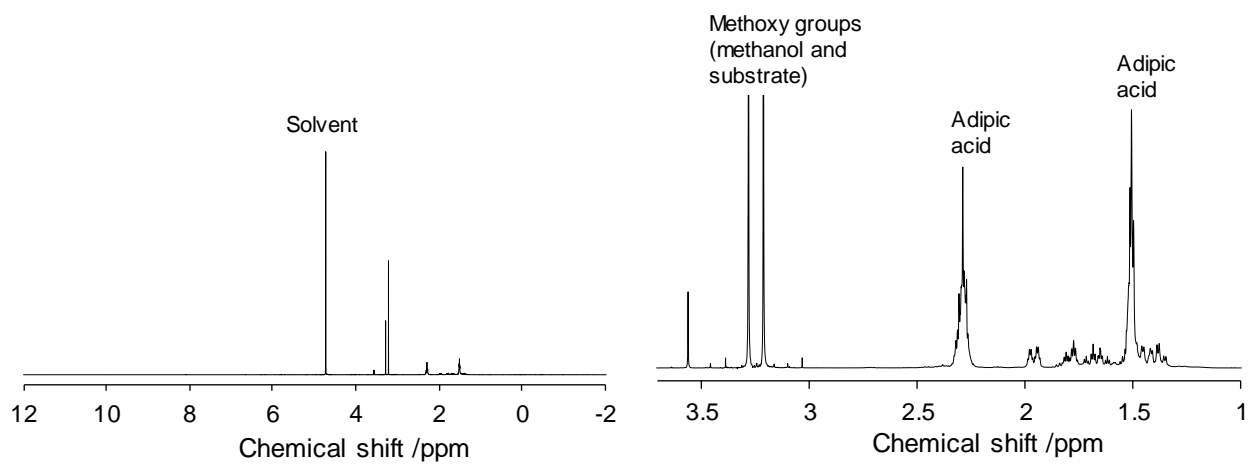

Fig. S1. <sup>1</sup>H NMR of reaction solution

Conditions: 2-methoxycyclohexanone (2-MCO) 2.1 mmol, H<sub>3</sub>PW<sub>12</sub>O<sub>40</sub> 55 μmol, D<sub>2</sub>O 5 g, O<sub>2</sub> 0.1 MPa (at r. t.), 353 K, 72 h. Reaction was carried out in glass tube with O<sub>2</sub> balloon. Left: full scale, right: enlarged spectra.

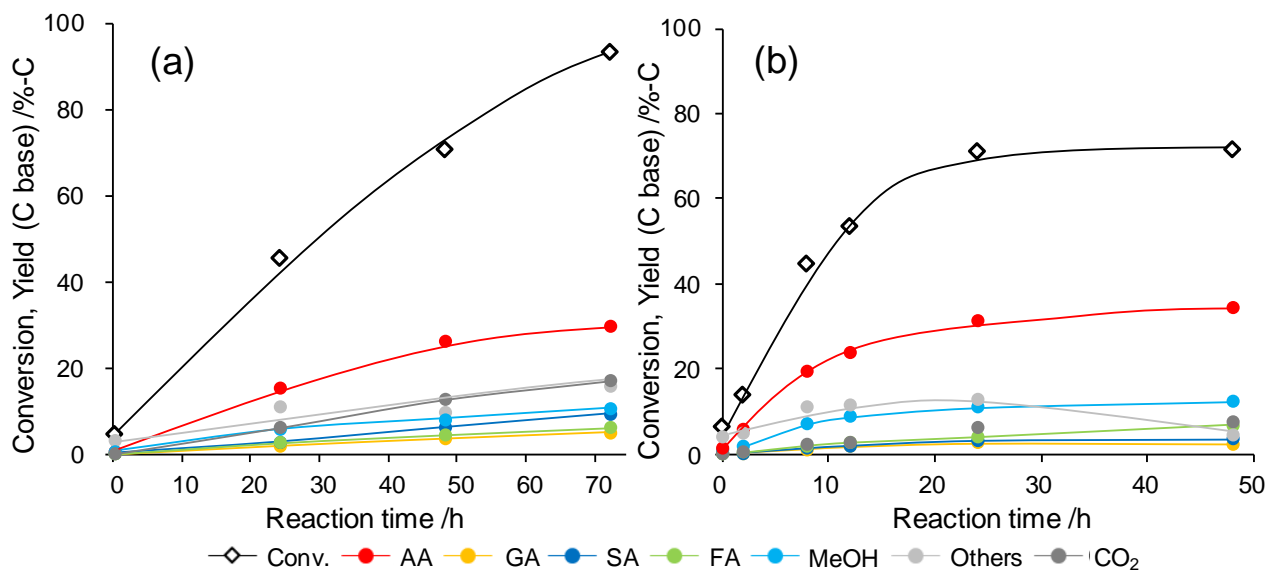

Fig. S2. Time course of the 2-MCO oxidation with typical vanadium catalyst. (a) V<sub>2</sub>O<sub>5</sub>. (b) H<sub>5</sub>PV<sub>2</sub>Mo<sub>10</sub>O<sub>40</sub>.

Reaction condition: 2-methoxycyclohexanone (2-MCO) 4.3 mmol, catalyst 55  $\mu$ mol, water 10 g, O<sub>2</sub> 0.8 MPa (at r. t.), 353 K, 0-72 h. AA: Adipic acid, GA: Glutaric acid, SA: Succinic acid, FA: Formic acid.

Table S1. 2-MCO oxidation with various catalysts.

| Entry | Catalyst<br>(Amount / $\mu$ mol)                                                            | Conv.<br>/% | Yield /%-C |     |      |     |      |        |                 | AA sel.<br>/%-C | Carbon<br>balance /% |
|-------|---------------------------------------------------------------------------------------------|-------------|------------|-----|------|-----|------|--------|-----------------|-----------------|----------------------|
|       |                                                                                             |             | AA         | GA  | SA   | FA  | MeOH | Others | CO <sub>2</sub> |                 |                      |
| 1     | Blank                                                                                       | 7           | 1.9        | 0.2 | <0.1 | 0.1 | 1.2  | 3.7    | 0.1             | 26              | 96                   |
| 2     | H <sub>5</sub> PV <sub>2</sub> Mo <sub>10</sub> O <sub>40</sub> (55)                        | 71          | 31         | 2.6 | 3.2  | 3.9 | 11   | 13     | 6.2             | 44              | 97                   |
| 3     | V <sub>2</sub> O <sub>5</sub> (55)                                                          | 31          | 11         | 1.4 | 1.9  | 1.8 | 3.9  | 7.0    | 3.6             | 37              | 105                  |
| 4     | V <sub>2</sub> O <sub>5</sub> (55) + H <sub>3</sub> PMo <sub>12</sub> O <sub>40</sub> (110) | 77          | 46         | 0.8 | 0.5  | 1.2 | 11   | 14     | 3.1             | 60              | 100                  |
| 5     | V <sub>2</sub> O <sub>5</sub> (55) + H <sub>3</sub> PW <sub>12</sub> O <sub>40</sub> (110)  | 79          | 36         | 1.9 | 1.6  | 2.7 | 11   | 21     | 5.8             | 45              | 98                   |
| 6     | V <sub>2</sub> O <sub>5</sub> (55) + H <sub>4</sub> SiW <sub>12</sub> O <sub>40</sub> (110) | 84          | 23         | 3.7 | 9.6  | 8.1 | 12   | 8.7    | 19              | 28              | 90                   |
| 7     | H <sub>3</sub> PW <sub>12</sub> O <sub>40</sub> (110)                                       | 60          | 45         | 1.1 | 0.2  | 0.4 | 9.7  | 3.8    | 0.2             | 74              | 97                   |
| 8     | H <sub>3</sub> PW <sub>12</sub> O <sub>40</sub> (110) <sup>a</sup>                          | 59          | 42         | 1.3 | 0.2  | 0.4 | 7.0  | 7.7    | 1.0             | 70              | 101                  |
| 9     | H <sub>4</sub> SiW <sub>12</sub> O <sub>40</sub> (110)                                      | 38          | 21         | 1.0 | 0.3  | 0.7 | 7.9  | 5.9    | 0.8             | 56              | 108                  |
| 10    | H <sub>3</sub> PMo <sub>12</sub> O <sub>40</sub> (110)                                      | 66          | 50         | 0.2 | <0.1 | 1.2 | 9.5  | 5.2    | 0.3             | 75              | 102                  |
| 11    | H <sub>4</sub> SiMo <sub>12</sub> O <sub>40</sub> (110)                                     | 60          | 45         | 0.2 | <0.1 | 1.1 | 8.2  | 4.4    | 0.2             | 76              | 105                  |

Reaction conditions : 2-methoxycyclohexanone 4.3 mmol, catalyst 0-1320  $\mu$ mol, water 10 g, O<sub>2</sub> 0.8 MPa (at r. t.), 353 K, 24 h.

<sup>a</sup>The sheath of autoclave was covered with teflon tube. AA: Adipic acid, GA: Glutaric acid, SA: Succinic acid, FA: Formic acid, MeOH: Methanol.

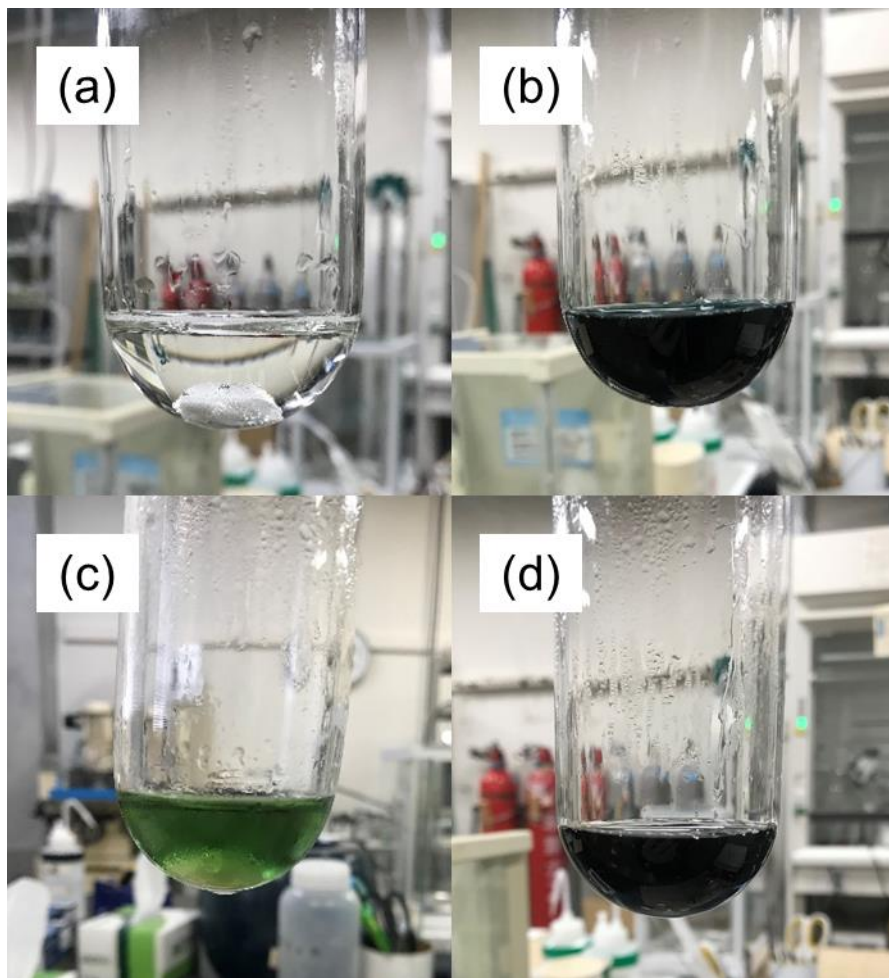

Fig. S3. The color of reaction solution with (a)  $\text{H}_3\text{PW}_{12}\text{O}_{40}$ , (b)  $\text{H}_3\text{PMo}_{12}\text{O}_{40}$ , (c)  $\text{H}_4\text{SiMo}_{12}\text{O}_{40}$  and (d)  $\text{H}_3\text{PW}_{12}\text{O}_{40}$  (at  $\text{O}_2$  0 MPa) as catalysts.

Reaction condition: 2-methoxycyclohexanone (2-MCO) 4.3 mmol, catalyst 110  $\mu\text{mol}$ , water 10 g,  $\text{O}_2$  or  $\text{N}_2$  0.8 MPa (at r. t.), 353 K, 24 h.

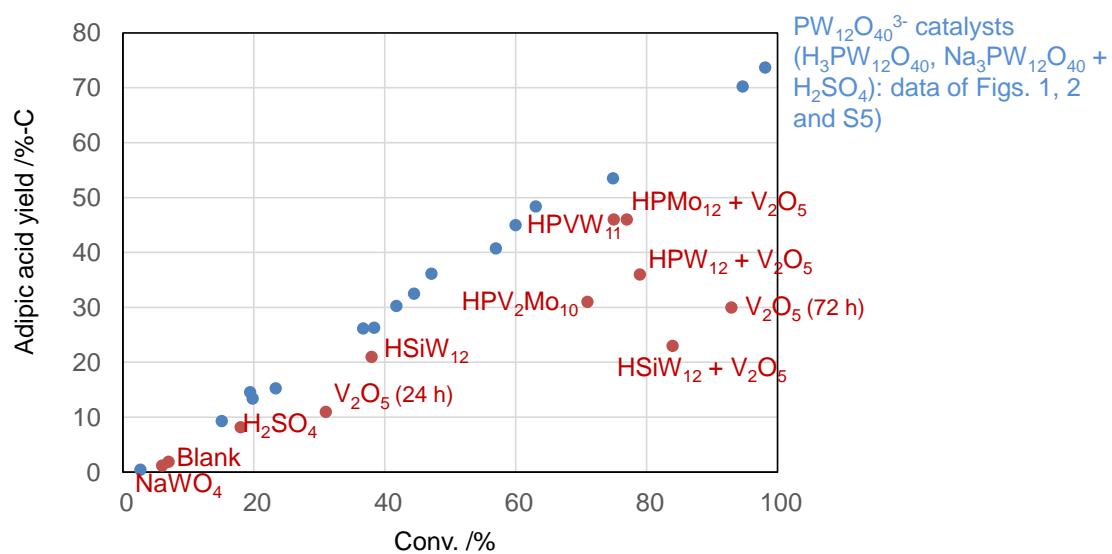

Fig. S4. Comparison of adipic acid yields between catalysts. The data are taken from Figs. 1, 2 and S5, below, for  $PW_{12}O_{40}^{3-}$  catalysts (blue color) and Table 1 for other catalysts (red color). The reaction temperature (353 K), 2-MCO concentration (4.3 mmol in 10 g water) and  $O_2$  pressure (0.8 MPa at r.t.) were the same for all data.

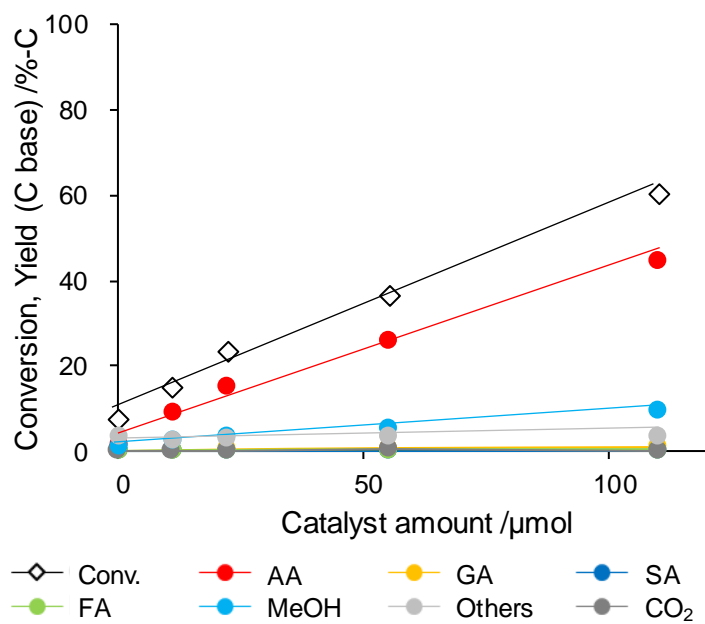

Fig. S5. Effect of amount of  $\text{H}_3\text{PW}_{12}\text{O}_{40}$  in 2-MCO oxidation.

Reaction condition: 2-methoxycyclohexanone (2-MCO) 4.3 mmol,  $\text{H}_3\text{PW}_{12}\text{O}_{40}$  0-110  $\mu\text{mol}$ , water 10 g,  $\text{O}_2$  0.8 MPa (at r. t.), 353 K, 24 h. AA: Adipic acid, GA: Glutaric acid, SA: Succinic acid, FA: Formic acid.

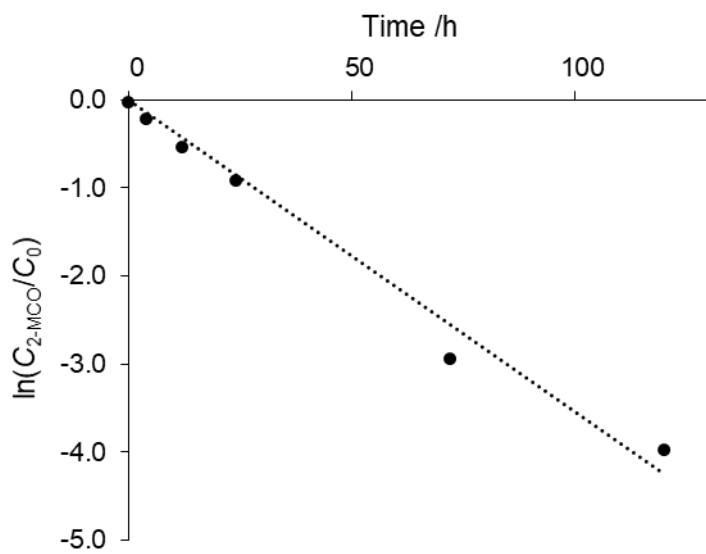

Fig. S6.  $\ln(C_{2-MCO}/C_0)$  vs Time.

Reaction condition: 2-methoxycyclohexanone (2-MCO) 4.3 mmol,  $H_3PW_{12}O_{40}$  110  $\mu\text{mol}$ , water 10 g,  $O_2$  0.8 MPa (at r. t.), 353 K, 0-120 h.
